# Supplementary material for: Quantitative modeling of the effect of antigen dosage on B-cell affinity distributions in maturating germinal centers
Source: eLife journal article supplement (doi:10.7554/elife.55678), 2020-06-15
Supplement: supp [file elife-55678-supp-v1.zip]

Archive with 2 entries (2 files):
- elife_poa_e55678_Transparent_Reporting_File.pdf
- elife_poa_e55678_Source_data_1.xlsx
