# Supplementary material for: Quantitative modeling of the effect of antigen dosage on B-cell affinity distributions in maturating germinal centers
Source: eLife journal article supplement (doi:10.7554/elife.55678), 2020-06-15
Supplement: supp [file elife-55678-supp-v1.zip › elife_poa_e55678_Source_data_1.xlsx]

## Sheet: scheme 1
Single-cell affinity measurements for scheme 1. Values are reported as dissociation constants (Kd) in nanoMolar units.
Dosage of Ag (micrograms of TT)	0.01	0.1			0.5		0.1		10
Total number of measured cells per dosage (pooled data)	13	405			85		336		273
Total number of measured cells per mouse	13	370	9	26	63	22	35	301	104	11	158
	10.7172	0.138119	4.16656	2.68072	0.669327	0.208315	1.30774	1.05783	4.21674	20.9285	402.737
	20.9315	0.298008	6.78996	1.66309	3.55551	2.82036	3.09739	1.66995	6.36041	0.566462	0.1
	22.9698	0.538297	13.3094	2.35198	4.40454	5.7226	4.44066	1.71363	9.59161	28.155	3.01773
	26.5341	0.75561	16.0376	3.21697	4.59346	8.61123	4.7058	1.73946	14.8476	56.7069	8.91353
	91.2402	0.794887	23.8883	3.27665	4.66351	9.28326	5.31864	2.05818	16.9779	56.7637	15.121
	101.597	0.862344	92.4328	5.02215	5.53525	9.28575	6.38938	2.38752	17.48	104.787	15.3864
	104.392	0.881924	155.742	9.46681	5.76446	14.8817	6.80628	2.91348	22.8405	130.924	16.0304
	106.927	1.05858	352.701	14.625	6.18928	15.2965	7.95286	3.64623	24.0507	145.111	18.1741
	108.35	1.10293	362.635	14.7595	7.10983	19.0476	7.9875	3.72298	27.8753	159.15	18.4068
	118.984	1.19845		18.1689	7.20934	22.3321	8.95973	4.03089	32.9205	192.237	19.4696
	123.8	1.22005		20.6835	7.43578	22.8144	13.8654	4.14881	38.6315	465.322	23.1904
	251.109	1.35619		25.0503	7.91399	26.6041	15.9133	4.26352	39.5223		25.1318
	442.323	1.94717		28.5681	8.04179	28.6957	16.0066	5.91874	42.3467		28.1075
		2.00558		30.998	11.7171	45.6751	19.8292	6.09454	42.5787		28.6454
		2.03332		36.9727	13.4829	54.24	23.2036	6.26038	44.0328		35.2511
		2.10566		40.5722	13.6068	72.2746	25.8838	6.62362	44.1929		37.4055
		2.13977		49.3479	13.6436	159.76	28.3479	7.10383	44.4608		38.5855
		2.33037		51.7527	14.4185	164.261	39.2833	7.26754	46.7415		38.6813
		2.84018		57.5162	15.0858	185.255	39.5029	7.46255	48.3952		48.2658
		3.00199		70.145	17.6116	259.984	43.0957	8.27774	48.6593		53.9697
		3.16784		103.157	17.7434	424.67	52.9799	8.28248	50.3122		55.0624
		3.1746		177.404	18.315	447.751	68.8373	8.58604	50.573		57.0517
		3.25621		208.384	19.5586		74.6019	9.79987	54.3705		58.4354
		3.36399		389.869	19.7238		77.4108	9.99154	54.7613		65.8982
		3.52901		434.208	19.9002		83.9774	9.99511	66.7382		72.6919
		3.81471		497.164	22.6746		86.3484	10.1162	70.3109		76.9911
		3.95105			34.1715		100.157	10.3456	72.9853		77.7401
		4.134			34.3911		100.232	10.3782	76.5337		77.7861
		4.13849			37.4317		120.868	10.6793	78.2001		82.46
		4.14843			37.5838		146.796	10.6901	84.3718		90.0711
		4.95726			38.3689		173.852	10.8525	87.7988		90.7209
		4.97636			41.6062		174.314	10.9762	88.0733		98.5648
		5.0555			44.6313		220.083	11.2505	88.885		101.105
		5.05638			50.4057		390.5	11.6509	97.5466		101.179
		5.10807			53.8129		410.397	11.9655	100.829		102.657
		5.80173			58.1211			12.0847	107.185		103.064
		5.81907			58.9743			12.2441	115.555		104.961
		5.89781			61.6528			13.0059	116.24		106.04
		5.94692			61.9371			13.0484	117.246		108.634
		5.98497			74.9079			13.9866	119.541		110.588
		6.05611			76.4622			14.3109	120.058		112.005
		6.09477			77.7994			14.598	123.115		114.943
		6.13974			84.5562			15.185	123.825		117.969
		6.29329			85.3079			15.5497	126.395		119.465
		6.37942			88.0661			16.0593	130.784		125.281
		6.49543			103.459			16.1224	135.39		127.727
		6.50236			105.977			16.268	136.362		131.968
		6.64029			114.316			16.269	142.735		135.683
		6.6876			126.317			16.3614	144.756		136.393
		6.71709			133.483			16.4562	145.73		137.053
		6.7283			140.598			16.4574	153.602		139.425
		6.78873			146.848			16.4968	158.787		140.414
		7.07896			147.401			16.5591	160.641		146.895
		7.12006			150.072			16.9945	162.83		147.734
		7.15892			151.492			17.1364	165.866		148.691
		7.376			168.936			17.6014	169.782		151.838
		7.44757			187.573			17.8116	179.917		155.643
		7.46216			226.51			17.9796	193.426		157.248
		7.87574			257.144			18.616	194.232		159.985
		8.03294			259.47			18.8033	201.05		163.771
		8.06058			261.786			19.3684	204.229		164.099
		8.24615			321.506			19.3923	209.523		166.874
		8.25474			463.603			19.4082	212.324		167.533
		8.44562						19.4519	221.584		168.111
		8.45951						19.5572	224.335		170.38
		8.71991						19.5961	224.509		184.421
		9.01286						20.0158	231.374		187.951
		9.01995						20.0932	233.703		190.877
		9.08974						20.5693	244.058		195.972
		9.39686						20.6347	244.069		203.614
		9.81592						20.9932	245.74		206.449
		10.5714						21.205	247.781		207.397
		10.5789						21.477	253.658		213.325
		10.5846						22.0521	258.19		219.304
		10.7134						22.3298	275.42		226.473
		10.7808						23.4428	276.121		230.274
		10.9776						23.4566	278.134		236.728
		11.005						23.6199	278.478		239.49
		11.0392						23.8766	283.141		242.175
		11.3115						24.6543	288.179		245.636
		11.5088						24.6935	290.08		248.8
		11.6175						25.275	296.587		254.331
		11.87						25.7113	296.818		254.391
		11.9521						26.5324	324.651		259.002
		12.4144						27.628	327.61		262.606
		12.4604						27.802	342.143		264.506
		12.4929						28.0439	342.806		267.107
		12.751						28.0453	354.448		277.15
		12.7681						28.1541	372.535		281.952
		12.8965						29.5686	380.071		283.293
		13.4505						29.5971	385.252		289.15
		13.6295						29.9407	398.949		293.55
		13.893						30.0852	403.353		301.014
		13.9755						31.0724	413.051		304.489
		14.1574						31.1545	414.128		306.058
		14.2602						31.446	419.26		307.59
		14.3344						31.9647	424.241		310.671
		14.3558						31.9757	426.755		312.006
		14.4621						32.3287	435.448		313.832
		14.6032						32.7322	457.583		316.853
		14.6549						32.8374	462.319		318.96
		14.7869						33.2578	471.174		322.73
		14.9891						33.4286	490.177		323.059
		15.2345						33.6001	494.658		323.403
		16.1866						33.7116			331.819
		16.3361						35.1484			334.603
		16.4608						35.1694			336.711
		16.7092						35.432			337.001
		16.7309						35.5026			339.267
		16.7559						36.1616			339.377
		16.7791						36.2195			339.646
		17.0546						36.606			341.206
		17.0854						37.2306			343.353
		17.0911						37.8499			343.615
		17.3932						38.1552			370.064
		17.4568						38.7818			372.001
		17.6816						38.9379			375.791
		17.6909						39.2104			383.344
		17.7885						40.0721			385.333
		17.9847						40.9181			388.317
		18.1196						41.1587			388.821
		18.43						41.6102			388.969
		19.1936						41.6251			393.285
		19.2103						41.6802			395.106
		19.4496						41.945			395.62
		19.4862						43.1246			398.051
		19.6619						43.7455			400.303
		19.7543						43.9951			405.821
		19.7773						45.4801			411.414
		20.0283						45.5522			411.863
		20.1102						46.2137			412.006
		20.1829						46.6096			413.483
		20.717						46.8693			416.319
		20.7228						47.187			422.444
		20.8917						47.3761			423.31
		21.418						47.6541			424.013
		21.6285						47.8954			428.939
		21.646						48.3162			430.309
		21.7459						48.8688			437.634
		21.9003						49.7038			439.758
		21.9186						49.7803			443.516
		22.3882						49.9097			446.008
		22.5239						50.5583			447.688
		22.5588						50.8645			449.67
		23.0577						50.9191			450.904
		23.5123						51.8439			451.152
		23.9416						52.0133			452.257
		24.1129						52.1312			452.307
		24.4635						53.1656			452.664
		24.4766						54.4456			457.303
		24.5798						55.5925			460.285
		24.7197						55.8045			462.606
		24.9335						55.9984			465.616
		25.0044						56.1911			470.602
		25.0378						57.7639			471.23
		25.2922						58.5672			480.146
		25.7581						60.1059			484.648
		25.7994						60.7826			493.165
		25.8587						61.3159
		25.9564						61.9603
		26.1672						62.0505
		26.3464						63.4044
		26.4106						63.6784
		26.4739						63.8636
		26.5775						64.2266
		27.1215						64.5044
		27.149						66.0496
		27.5984						66.5182
		27.7689						68.1406
		27.8952						68.5635
		28.1051						69.0385
		28.1321						69.7118
		28.5249						70.1689
		28.5953						71.4336
		28.6031						71.532
		28.8123						71.6629
		29.0295						72.4759
		29.035						72.7664
		29.1059						74.0274
		29.1218						74.3196
		29.8883						74.8135
		30.4659						76.0852
		30.8058						76.5253
		31.1037						77.0848
		31.2266						77.6755
		32.0254						80.4317
		32.1037						80.4788
		32.1367						80.7635
		32.1536						81.6604
		32.3029						82.6396
		32.6641						83.1584
		32.6831						83.7673
		33.6931						85.3115
		34.0979						85.8379
		34.5085						87.1899
		34.7049						88.7127
		34.8814						88.8101
		35.5098						89.1033
		35.9137						89.156
		36.73						89.187
		36.74						89.3596
		37.0859						89.5099
		37.7231						91.6205
		39.017						91.7819
		39.9657						92.5409
		40.096						93.0517
		40.2197						93.4332
		40.386						93.5395
		40.5625						94.0901
		40.7086						94.5936
		41.1773						95.1362
		41.4747						95.3845
		41.6361						96.8676
		41.8265						96.9657
		41.9569						102.222
		44.0018						103.816
		44.2373						106.34
		44.4934						106.511
		45.0139						106.776
		45.1639						108.131
		45.3579						109.467
		45.8521						109.695
		46.2279						118.131
		46.5235						119.071
		47.8408						119.317
		49.2892						120.425
		49.4585						121.449
		50.6339						124.834
		50.7052						127.425
		51.3058						128.027
		51.8339						128.69
		52.0764						130.224
		52.6184						131.501
		52.6996						132.177
		52.972						133.188
		53.2362						133.3
		53.4822						133.869
		53.8705						134.436
		53.9528						135.11
		53.9826						138.746
		54.3459						144.04
		55.4438						150.698
		55.9585						153.838
		56.2919						155.202
		56.9393						155.283
		57.9085						155.715
		58.084						155.833
		58.7676						161.549
		59.188						162.584
		61.7825						177.788
		62.5432						190.129
		63.622						190.566
		63.6761						196.691
		64.2902						197.432
		64.8093						197.757
		64.8404						201.063
		65.1803						202.896
		66.4213						205.658
		66.4514						207.774
		66.9966						208.572
		67.9163						212.99
		68.0776						218.167
		68.1616						224.144
		68.4315						227.331
		69.4013						238.061
		72.5743						238.161
		73.3398						239.156
		73.9788						239.388
		77.5262						239.462
		78.034						242.737
		78.0435						243.934
		78.2985						245.425
		78.8707						250.36
		79.9692						257.321
		80.2256						258.474
		80.3658						262.225
		80.6428						266.759
		80.9497						268.851
		81.2397						269.218
		81.5645						280.531
		83.3979						281.411
		84.4303						298.827
		84.703						313.09
		85.8859						318.803
		86.6178						361.615
		86.7183						371.683
		88.5238						386.569
		89.6578						386.986
		91.1965						392.813
		91.9617						401.02
		92.8453						431.229
		93.409						438.627
		94.235						442.313
		94.3435						446.418
		97.04						449.298
		97.2334						450.164
		97.4143						458.177
		98.1934						469.659
		99.1592						479.981
		99.3559						490.046
		99.9403						499.076
		102.265
		106.973
		107.04
		107.167
		113.204
		113.376
		116.632
		121.817
		124.642
		125.636
		126.365
		126.52
		126.56
		130.803
		133.104
		134.649
		135.68
		140.239
		140.484
		143.297
		143.546
		144.666
		144.763
		146.668
		147.074
		148.947
		151.337
		153.58
		158.031
		165.45
		174.069
		175.854
		178.711
		178.749
		180.982
		184.187
		184.995
		186.608
		193.65
		211.205
		214.038
		222.588
		225.343
		228.123
		231.395
		240.198
		244.3
		247.458
		255.762
		257.982
		261.216
		267.735
		275.513
		276.295
		303.521
		332.899
		342.412
		361.199
		405.355
		410.832
		420.181
		426.043
		429.288
		436.052
		438.996
		446.498
		473.945
		476.849
		499.111

## Sheet: Scheme 2
Single-cell affinity measurements for scheme 2. Values are reported as dissociation constants (Kd) in nanoMolar units.
Dosage of Ag (micrograms of TT)	0		0.01			0.1			0.5			1			3			10
Total number of measured cells per dosage (data pooled from all mice immunized with the same dosage)	86		105			161			226			866			468			635
Total number of measured cells per mouse	17	69	26	36	43	53	93	15	87	104	35	227	232	407	80	198	190	15	9	18	214	379
	62.8281	22.9094	5.7293	5.24509	494.684	6.74608	0.12372	7.08093	93.5298	1.26748	5.86392	494.68	0.1	0.206946	18.611	0.721749	1.0658	436.03	443.002	442.769	362.1	1.15244
	71.5696	25.4133	12.2015	7.02967	459.152	9.1093	1.12145	8.31229	5.52624	2.48661	15.1008	490.987	0.840744	0.226049	23.4217	1.69214	3.84135	402.892	222.669	427.205	487.379	3.23471
	86.1935	27.1301	12.8678	8.67115	438.531	11.04	2.75665	9.32704	9.20089	4.1256	20.1328	452.175	1.16101	0.239337	29.038	1.73034	4.2318	338.001	107.97	323.819	482.566	3.68886
	101.86	30.4142	23.0185	10.6225	424.639	11.9935	7.14604	10.2227	10.9669	5.61342	30.2645	447.624	1.39035	0.300373	30.7347	2.01266	4.52955	269.788	99.9507	272.782	447.456	7.8448
	106.094	36.8582	24.7514	11.8957	415.81	17.0108	7.27336	20.8882	11.0137	10.8105	33.7228	433.214	1.78883	0.407442	30.8923	2.48266	5.96787	224.015	86.8635	253.839	447.22	10.0947
	112.123	40.2654	27.881	12.3499	396.617	19.0224	8.54341	25.3443	11.4439	10.9233	34.4412	432.419	1.86258	0.681871	32.202	2.73279	6.82346	181.949	57.9996	239.554	423.39	11.8191
	121.895	40.8552	33.4042	16.8266	367.818	21.6187	10.1241	37.9241	12.2901	11.4286	39.2094	416.646	2.0386	0.749003	37.2792	3.1601	6.96559	177.44	28.9351	214.579	381.1	12.3561
	139.258	44.4121	55.4576	16.9692	358.396	22.0512	10.2058	45.8402	13.8293	14.9516	44.718	398.55	2.27578	0.786876	37.4915	3.3632	8.27979	145.262	21.9805	145.495	400.862	12.6111
	150.584	46.8494	56.7947	30.2409	341.318	22.8199	11.1717	62.6048	15.9479	15.0562	48.5713	392.265	2.59369	1.31313	38.5738	5.31605	8.44699	112.325	0.1	124.692	399.26	12.7612
	160.118	48.1767	61.9011	35.7537	225.376	27.2197	12.6166	66.9563	19.4497	16.2928	49.0511	389.654	2.76296	1.38287	38.8837	5.42086	8.63897	97.1727		100.637	251.1	12.8438
	225.48	49.9563	63.5329	45.6647	205.97	27.5036	13.5708	75.721	24.7481	16.6081	53.9316	387.137	3.54176	1.43514	48.2568	5.47541	9.98753	96.1958		92.381	394.957	13.1012
	242.542	52.594	71.5969	49.4974	198.079	35.0163	15.2743	97.234	26.2676	17.4868	56.9949	383.777	3.58949	1.44331	51.1213	6.60409	10.3996	71.427		86.3289	30.1	15.2632
	281.446	60.8543	99.7313	52.3435	149.83	36.1423	16.1891	125.93	26.5919	19.3743	61.4181	382.882	3.94375	1.49917	52.6279	9.04992	11.1792	39.9998		82.6408	387.883	16.05
	299.707	61.1677	113.589	56.5721	141.861	42.402	17.8071	129.497	30.6185	20.109	63.791	364.547	4.28636	1.61346	63.0154	9.44728	12.6653	28.1758		59.687	360.831	16.8857
	317.854	64.6746	131.267	70.7955	128.152	42.6125	19.6294	153.08	33.9695	22.064	67.3776	358.384	4.45956	1.7155	69.487	10.258	12.9996	8.72983		41.9888	360.548	18.7703
	337.848	67.9534	143.126	77.5966	117.599	45.7567	19.6618		34.0114	23.6377	68.6035	357.603	4.5621	2.33216	71.4231	10.6401	13.567			32.5655	342.787	19.4951
	423.727	74.0955	143.449	92.5077	111.765	50.0593	21.0804		34.4137	24.408	72.5432	351.791	5.12631	2.4562	72.3554	10.7085	14.83			10.8474	338.149	19.8361
		77.1496	211.009	103.44	101.199	50.4824	21.2228		39.622	24.4261	84.9127	341.264	5.19909	2.695	72.8714	11.3387	15.0256			1.02006	332.233	21.5748
		81.9252	244.996	106.446	100.476	53.9266	21.7474		40.1254	25.3126	87.6068	327.364	5.30892	3.31109	73.922	12.1627	16.2262				291.1	21.5871
		88.6992	304.821	108.295	93.2767	56.096	22.5351		41.6024	25.5948	105.407	326.745	5.44717	4.10201	79.7798	12.3531	17.1717				328.033	21.6862
		89.1442	367.046	112.579	81.2648	56.2956	22.8155		42.3719	25.9818	107.387	322.612	5.44921	4.13771	82.6208	12.9934	17.65				256.1	21.8881
		100.333	384.927	117.665	65.8738	56.5644	23.9527		50.1889	31.7582	161	311.657	5.64988	4.42476	84.7008	13.5886	17.924				320.428	23.4946
		112.986	412.448	131.811	63.2775	58.3605	24.5001		50.8264	31.8252	184.463	296.001	5.71629	4.56185	85.0462	14.0371	21.0294				314.379	25.3908
		123.543	449.789	151.319	60.1251	59.4294	24.8383		56.5143	31.8966	193.854	294.114	5.773	4.67198	89.8559	14.4574	21.4046				308.558	25.8228
		127.562	476.809	153.5	49.3729	61.6785	26.7263		58.7877	31.9894	209.582	294.057	6.21383	5.24376	94.1202	16.4305	25.201				298.831	26.0109
		130.159	482.748	155.436	49.1812	62.3978	29.7135		62.6635	31.9944	214.165	281.764	6.42426	5.2704	101	16.8076	25.3127				67.1	26.9842
		132.932		194.162	48.6845	63.3543	30.7793		69.5711	32.4342	232.149	267.303	6.62646	5.54951	102.107	18.7567	27.2983				288.527	27.0491
		133.556		203.719	47.1605	69.6968	32.038		71.712	36.7703	237.569	253.186	6.63991	5.58494	102.111	19.34	27.8518				286.983	27.1197
		139.494		205.571	44.4779	78.7972	33.2371		74.6519	38.7403	266.158	248.277	6.74241	5.58575	109.692	19.3733	32.6863				280.535	28.9088
		142.073		211.905	43.3278	81.2669	34.357		75.9705	38.7724	305.892	246.129	6.77068	5.63701	112.104	21.4506	36.9625				243.1	29.257
		150.152		222.434	38.3859	84.9527	34.5673		76.8981	40.8815	312.228	244.79	6.79227	5.69825	116.256	21.5391	37.3963				252.965	29.8109
		151.195		232.708	35.9575	86.2328	35.3994		77.1289	42.3993	372.445	239.178	6.93073	5.83326	118.526	21.5487	38.6574				102.1	29.9605
		154.896		330.106	30.9385	86.9952	39.3081		83.5045	42.6206	393.113	233.33	7.0814	5.873	120.453	22.1823	40.323				250.008	30.7069
		157.135		418.804	28.0964	88.1936	39.7018		92.3651	42.841	402.397	213.299	7.09336	6.21589	124.355	24.4574	40.51				241.021	30.8945
		161.794		445.595	27.543	88.8765	40.9678		93.0044	45.5909	476.564	211.656	7.22385	6.29484	125.094	24.5311	40.6377				238.292	30.9285
		163.123		446.504	23.4861	95.3954	42.7752		107.87	46.0951		208.394	7.74442	6.4262	127.061	25.2827	42.2972				377.1	31.1512
		176.27			18.9294	98.3632	44.2633		110.891	46.1056		205.775	9.34104	6.43666	143.942	26.699	43.7385				296.1	32.521
		179.685			16.854	147.96	44.8583		110.925	48.7681		205.73	10.3017	6.44982	152.534	27.2597	44.3047				226.878	32.6792
		183.252			12.6135	148.075	45.8086		112.235	50.3182		200.459	10.3966	6.51503	160.753	27.5046	44.7007				214.1	32.9336
		183.472			8.68384	156.382	49.8969		114.859	52.7399		189.747	10.9622	6.70897	167.18	28.2259	45.0689				226.167	33.3894
		186.564			1.41736	172.588	56.4256		116.227	55.0533		188.146	11.1837	6.75517	171.62	29.9579	45.7697				428.1	33.519
		199.866			0.240071	181.314	58.0585		118.51	55.7558		185.274	11.2812	6.76197	174.125	29.9983	47.1784				78.1	34.2295
		215.91			0.188183	189.528	59.0772		119.203	60.7288		183.718	11.8616	7.17968	180.222	30.5675	49.0402				216.801	34.7859
		246.752				196.301	60.1967		119.873	64.3561		174.873	12.0079	7.251	181.825	31.2654	49.69				214.961	34.9838
		249.166				248.254	62.8634		120.811	65.6263		174.055	12.4114	7.25708	183.537	31.7017	50.1856				193.372	35.0141
		262.553				260.541	64.5227		121.025	66.1209		173.43	12.6267	7.38823	184.872	32.9961	51.5728				192.633	35.3119
		262.563				262.538	72.8188		121.976	70.2688		171.376	12.7414	7.42182	194.847	33.477	52.7425				230.1	35.3175
		266.497				277.638	77.1324		122.613	70.5581		170.324	13.0601	7.59805	198.966	33.9301	55.9848				176.564	35.4277
		268.863				325.684	80.1547		122.855	70.6738		166.791	13.3643	7.7771	200.509	36.5891	57.0504				174.365	37.1431
		272.078				340.054	80.5292		123.626	70.6997		160.378	13.4445	7.80399	212.899	37.2031	58.0312				283.1	38.0811
		273.346				375.743	88.5948		125.241	71.1032		159.633	13.5273	7.86666	221.083	38.5253	60.2952				161.425	38.9044
		296.733				450.338	91.2125		127.949	72.5801		157.964	13.9701	7.95763	230.268	39.0159	61.6325				160.123	40.4334
		302.865				459.315	93.0566		130.709	77.2297		157.905	14.7951	7.98297	230.88	39.0177	64.6712				158.277	40.545
		303.192					94.0886		140.276	79.347		157.354	15.3775	8.2227	231.546	39.146	65.4079				157.133	40.9746
		312.953					95.1766		153.16	94.3732		157.307	15.7867	8.27698	232.904	41.2431	65.7462				275.1	41.4237
		330.293					95.7627		155.248	95.7496		157.018	16.2054	8.33029	237.174	44.2864	66.3247				151.718	41.9901
		336.195					97.1918		172.963	98.8254		156.869	16.4621	8.59049	238.276	45.0793	66.4604				151.043	42.2243
		346.64					97.8016		183.583	104.999		156.033	16.6813	8.59217	240.729	46.0427	66.4717				147.195	42.2989
		384.93					102.584		196.451	109.761		155.83	16.8712	8.60165	252.936	46.188	67.4199				152.1	43.3978
		397.362					108.439		198.162	114.007		150.245	17.1278	8.63463	258.89	46.6556	68.6023				203.1	43.4545
		419.017					108.457		203.897	116.567		150.213	17.3338	8.69994	266.736	47.7148	72.9342				235.1	43.6103
		419.4					108.536		211.978	121.154		149.438	17.7609	9.07828	289.449	47.823	73.1846				426.1	44.0728
		433.079					110.205		219.512	121.234		143.055	18.16	9.15459	312.242	48.4355	73.8814				141.426	44.3236
		451.458					117.448		220.181	122.332		138.677	18.6023	9.46293	335.189	50.8463	76.0615				140.232	44.6538
		452.941					122.251		226.029	122.431		136.961	18.8202	9.51986	348.052	52.4451	76.8873				223.1	45.5461
		461.127					123.397		228.799	125.98		135.614	19.4989	9.54931	381.109	52.9027	79.7758				139.867	46.0014
		469.454					124.487		238.237	130.847		134.209	19.7981	9.5618	389.218	54.5679	80.2999				138.673	46.7905
		476.788					136.197		243.046	133.02		133.772	20.254	9.63722	392.469	54.6945	82.1394				134.281	46.8075
		477.238					145.576		288.159	134.741		133.506	21.0441	9.77581	392.934	54.8883	83.4884				331.1	48.6123
							149.948		290.402	147.153		127.303	21.605	10.045	409.366	58.4186	84.0852				257.1	49.628
							152.713		302.149	149.96		127.285	21.9587	10.2762	410.033	62.1173	87.5895				131.329	50.5954
							156.479		306.015	150.024		126.527	22.3204	10.4294	428.022	62.2827	89.3876				258.1	51.3913
							160.864		325.76	151.592		122.933	22.785	10.5399	433.367	64.2342	90.9151				128.95	51.7476
							163.51		326.504	161.531		119.517	22.9362	10.9099	459.126	64.3432	90.9881				128.557	51.9061
							165.855		335.305	163.351		119.456	23.0459	11.1343	464.26	64.6601	91.204				127.601	52.629
							179.785		340.813	172.797		119.42	23.557	11.7896	466.887	68.5998	93.1102				125.972	53.0506
							194.129		359.604	176.909		115.25	23.6252	11.8227	467.284	70.6722	95.1949				106.1	53.0939
							195.808		368.699	181.178		111.875	23.9194	11.9421	481.571	71.4524	96.1738				80.1	53.5681
							202.085		379.955	186.011		110.111	24.0163	12.4572	484.046	71.7089	100.456				340.1	53.5956
							205.893		393.854	191.472		110.001	24.0397	12.5021	490.647	72.0517	107.216				119.106	53.6296
							205.986		395.279	194.372		109.308	24.3157	12.664		72.7242	107.793				115.11	53.9473
							205.997		399.726	208.157		108.453	25.0357	12.8575		72.7446	110.575				114.273	54.7092
							214.586		400.264	224.922		106.902	25.6585	13.1038		73.6033	114.271				109.23	55.6217
							231.184		407.751	238.52		106.554	25.6851	13.5		73.7907	115.187				23.1	55.9272
							232.343		462.101	238.625		106.548	26.375	13.7885		75.6293	118.449				108.422	56.2139
							233.023		475.545	261.369		106.298	27.0724	13.8904		78.4989	118.691				45.1	56.495
							249.941		418.314	270.437		103.32	27.6812	14.2514		79.3251	118.693				106.107	56.7205
							288.653			284.647		101.944	28.2884	14.2526		81.0814	119.1				105.888	61.2109
							301.048			294.726		100.693	30.0807	14.4904		82.9504	121.798				150.1	61.8168
							326.621			296.169		98.2479	30.2701	14.7278		83.693	123.954				102.348	62.7152
							439.779			300.058		96.7127	31.0202	14.7564		87.7448	128.169				102.179	63.0101
							480.172			310.708		95.969	31.3502	14.9308		88.0017	131.54				70.1	63.6746
							151.933			316.931		95.4347	32.5981	14.9677		88.8538	132.368				99.2814	64.5496
										373.07		93.5118	32.6345	15.006		90.0108	132.867				207.1	65.1635
										397.406		93.4892	33.1148	15.2583		93.0419	140.492				371.1	65.2788
										416.091		92.9549	34.6022	15.4454		95.5844	140.626				7.1	65.8014
										446.326		92.6697	34.9278	15.4592		95.9765	141.525				91.5292	66.6547
										459.263		92.4881	35.2414	15.4876		96.045	144.509				91.1935	66.7959
										485.938		92.0992	35.7587	15.8709		96.311	145.099				401.1	67.3837
										23.5105		91.8218	36.1691	15.9448		99.8604	147.135				320.1	67.9852
										487.009		90.0152	37.0535	15.9739		101.589	147.188				86.3459	68.5654
										112.122		88.3953	37.3425	16.1932		105.848	149.883				85.9583	68.8899
										191.97		86.346	37.6351	16.3414		106.431	152.571				85.9534	69.4686
										222.077		85.9872	37.8354	16.3475		109.743	152.775				138.1	69.5988
												85.814	39.3031	16.3862		116.531	153.178				84.7637	69.6169
												85.8021	39.4944	16.4856		119.598	155.086				84.0832	69.9188
												85.4828	40.0817	16.7295		120.913	158.057				108.1	70.8787
												85.0017	42.9076	16.8411		121.026	162.606				8.1	71.3742
												84.3782	42.9732	17.1061		129.038	167.71				81.3226	71.3761
												83.2462	43.6437	17.1691		133.399	167.796				80.2698	71.7772
												82.8121	44.1902	17.413		136.995	169.608				78.2808	71.9772
												82.7604	44.3182	17.5011		138.002	171.559				276.1	71.9815
												81.1425	46.508	17.6625		139.037	172.901				96.1	72.0525
												79.6303	48.8824	17.8904		141.939	173.965				77.7635	72.1694
												78.0926	48.9562	18.0378		142.19	179.735				68.1	72.3386
												77.5615	49.0319	18.1195		142.464	181.4				105.1	72.4575
												74.4934	49.2663	18.1469		142.467	183.552				73.3052	72.5189
												74.4117	49.3657	18.1809		143.469	183.896				392.1	72.999
												74.2975	49.6078	18.7472		143.739	187.323				70.3688	72.9996
												73.0085	49.6717	18.8541		145.957	187.453				153.1	74.2828
												72.3732	50.0854	19.0445		147.392	188.882				309.1	74.383
												71.7796	50.7993	19.0617		147.413	192.926				66.4367	76.2454
												71.124	51.3414	19.5373		149.041	195.323				66.2885	80.3312
												70.4144	51.6677	19.761		154.527	203.249				64.4901	80.683
												70.3363	52.1159	20.0711		154.58	205.226				82.1	81.1556
												68.9172	53.2473	20.1043		157.015	207.532				167.1	81.8452
												68.1322	53.5082	20.2006		157.53	209.124				54.4877	82.5007
												67.6042	55.6532	20.6186		163.035	212.27				293.1	83.8376
												66.4844	56.3042	20.6411		163.101	214.025				345.1	84.5813
												65.3258	56.3316	20.9452		173.415	218.347				53.8908	87.0955
												65.0343	56.4844	21.3315		174.984	218.79				43.1	87.4179
												63.8629	56.6732	21.3943		178.872	220.954				178.1	87.7627
												62.464	57.2196	21.5238		182.16	224.367				20.1	87.93
												59.6969	57.2677	22.0271		182.286	226.638				179.1	88.6053
												59.3845	57.7427	22.0941		184.673	243.39				51.3282	88.7569
												58.1883	58.8115	22.2103		184.793	253.422				49.4101	92.3948
												57.3806	58.9047	22.3186		195.492	253.983				46.9675	92.5366
												56.9732	60.3443	22.6422		195.63	259.134				4.1	92.7799
												56.7812	61.3012	22.7696		196.138	259.404				46.3897	93.7488
												56.1354	61.8202	22.8571		197.099	261.011				383.1	93.9073
												55.3681	62.0859	22.9678		201.582	261.413				233.1	94.3925
												53.3793	62.7691	23.3663		203.585	264.324				85.1	94.9978
												49.5573	63.5673	23.3896		205.638	273.361				64.1	95.5573
												48.0503	63.8217	24.158		205.645	277.509				56.1	96.0228
												47.9781	64.7506	24.2192		211.804	281.702				93.1	96.43
												47.7715	64.7779	24.395		213.572	283.06				39.5673	98.9171
												47.6053	65.6642	24.4327		215.082	286.576				273.1	100.256
												47.0287	66.4275	24.8787		218.505	288.365				36.2463	100.276
												46.779	66.5642	25.3557		222.201	296.912				35.5103	102.334
												46.3588	68.5403	25.5066		222.763	316.346				35.4737	102.576
												45.3125	70.6519	25.5162		231.65	324.977				33.7289	103.354
												45.1126	70.6667	25.9341		233.339	325.268				271.1	103.757
												45.0616	71.3504	26.3075		237.927	326.366				31.8383	105.267
												45.0162	74.259	26.5552		238.429	326.393				31.7298	105.553
												44.3584	75.4038	26.6048		239.418	329.916				31.6696	105.914
												43.2396	76.7776	26.6899		242.099	330.417				250.1	107.472
												41.5543	76.8022	26.8028		244.827	331.127				31.4176	108.515
												40.8112	76.8757	26.9126		247.763	339.797				30.3994	109.275
												40.7035	78.3711	26.9866		256.604	340.506				282.1	109.864
												40.5206	79.1586	26.9879		258.89	344.583				30.0958	111.153
												40.3058	80.5904	27.3857		261.749	344.648				29.7784	111.403
												38.9209	83.7174	27.5792		268.515	352.407				301.1	111.617
												37.5691	85.869	27.6415		268.529	359.756				27.9971	113.039
												37.0136	89.0782	27.8066		270.852	360.86				27.6949	114.267
												36.9334	90.3113	28.3149		278.837	363.148				27.1563	114.271
												36.8657	93.0485	28.4211		285.929	370.225				245.1	114.737
												36.4954	95.8612	29.0466		288.447	371.793				334.1	115.15
												36.2916	96.6774	29.1208		288.798	373.02				24.3559	115.291
												35.4385	97.4084	29.3885		289.149	379.784				23.1206	115.577
												35.2944	97.9058	29.7914		290.046	383.835				170.1	115.761
												34.9237	98.3296	30.652		295.243	388.339				305.1	116.591
												34.8934	98.784	30.746		302.028	398.995				397.1	118.227
												34.7341	99.2484	30.8731		321.003	406.057				98.1	119.202
												34.5598	101.888	30.881		321.019	406.759				18.1	119.998
												34.4598	103.677	30.9461		333.153	418.605				52.1	120.226
												34.1518	104.489	32.9068		336.386	421.612				20.5272	120.712
												33.9281	104.786	33.5365		340.504	429.191				144.1	121.788
												33.9031	104.845	33.7033		349.671	429.815				19.6546	123.926
												33.0248	105.643	34.2764		350.457	432.982				83.1	124.946
												32.9709	106.162	34.6199		351.887	438.888				406.1	127.475
												32.9051	106.29	34.9435		356.184	443.121				236.1	127.894
												29.6573	107.893	35.1645		369.036	443.193				3.1	129.313
												29.1809	110.772	35.5895		369.241	455.917				17.47	130.338
												28.864	111.152	35.7426		401.741	460.284				17.3549	131.21
												28.5067	113.561	35.8802		408.269	463.298				49.1	131.324
												28.4787	119.53	35.9096		412.09	463.707				79.1	131.66
												28.1134	119.943	36.5014		419.701	473.294				14.8743	131.897
												28.0093	122.681	37.7288		423.112	477.228				14.8484	133.165
												27.7431	125.388	37.8905		429.478	491.406				14.245	134.743
												26.1534	125.641	38.2544		437.011	492.647				13.6487	134.986
												25.9057	133.852	38.631		441.667					12.9768	135.725
												25.6841	143.361	38.7226		447.993					155.1	136.594
												25.4829	144.849	38.7424		448.312					11.8451	137.872
												25.4002	151.061	38.7472		454.137					11.759	139.973
												24.5533	156.586	38.8102		458.855					77.1	140.432
												23.3919	156.989	39.4844		467.237					8.98459	141.664
												22.2306	165.089	40.7833		489.219					90.1	142.337
												22.2006	167.264	41.2321		498.863					8.28129	146.949
												22.1574	169.451	41.6489							7.56031	147.947
												22.0731	173.998	41.8636							7.48049	149.393
												21.8348	184.362	42.1074							6.50554	150.704
												21.2494	185.927	42.1382							6.37619	153.636
												21.1076	187.359	42.5307							6.25625	153.709
												19.4482	190.916	42.5503							5.1	155.134
												18.4245	193.297	42.7074							274.1	156.614
												17.7283	194.869	42.868							76.1	157.502
												16.6439	199.091	44.1258							4.70003	157.856
												16.0881	205.532	44.5827							9.1	160.714
												16.058	206.496	44.6491							15.1	161.029
												15.8574	214.248	44.8898							60.1	162.394
												15.5097	214.654	45.0479							2.93856	163.032
												13.8262	223.068	45.3193							2.75928	163.644
												13.7679	238.732	46.5658							41.1	165.304
												13.2433	242.022	47.1953							1.52898	172.038
												12.4715	255.834	47.8677								172.778
												11.9769	265.365	48.068								172.793
												7.84451	276.735	48.7791								173.539
												7.83894	298.975	48.9497								173.94
												6.79204	319.455	49.0984								177.111
												6.32717	342.682	49.0995								177.285
												5.03022	348.424	49.1225								177.48
												3.95056	352.42	49.623								179.419
												3.02107	357.482	49.7854								179.628
												2.43696	383.189	50.1612								180.52
												1.93288	385.741	50.6997								180.709
												1.72755	393.489	51.2635								180.753
												0.896755	400.399	51.3547								181.143
													410.791	51.6164								181.329
													422.886	51.8622								184.717
													456.095	52.3162								185.328
													461.522	52.539								186.737
													494.925	52.7228								189.855
														52.7597								192.09
														52.9025								194.852
														53.7414								198.431
														54.2315								200.582
														54.4829								201.006
														55.0772								202.478
														55.2283								202.962
														55.8038								203.466
														56.1012								204.416
														56.4055								204.994
														58.0101								206.193
														59.2405								206.872
														59.2544								208.582
														59.3081								208.896
														59.3403								209.244
														60.1918								212.287
														60.4664								214.061
														60.497								215.254
														60.7978								217.026
														60.8486								217.251
														62.6554								219.195
														63.0184								220.163
														63.2179								221.282
														63.6918								221.42
														63.6939								222.981
														63.9732								224.36
														64.0247								224.576
														64.6873								225.479
														65.2732								225.84
														65.3421								226.156
														66.8524								227.112
														66.9375								229.08
														68.7049								229.61
														68.9885								231.086
														69.0503								233.593
														69.4145								234.819
														69.5197								236.196
														70.2286								236.357
														70.512								236.697
														70.6998								238.735
														71.0399								241.545
														71.1285								242.091
														71.1896								243.999
														71.2099								246.302
														71.8077								247.029
														72.154								252.324
														72.6781								252.394
														73.2208								254.111
														75.0557								254.654
														76.169								256.206
														76.5682								256.477
														76.9317								256.988
														77.0343								258.413
														77.2621								260.884
														77.5113								263.423
														77.8726								264.242
														78.4498								265.602
														78.7248								267.108
														79.4393								268.726
														80.1593								268.879
														80.8282								269.478
														81.2762								269.587
														82.0551								281.037
														84.627								282.126
														84.8803								283.476
														85.0931								283.66
														87.9186								286.558
														89.1998								287.641
														89.5056								290.339
														91.6067								290.587
														92.8112								290.64
														97.2734								291.081
														98.4841								291.114
														101.369								292.527
														103.442								295.013
														104.218								297.78
														105.896								298.603
														106.535								299.788
														107.612								302.613
														108.351								303.973
														109.098								303.978
														110.069								304.805
														113.015								307.053
														113.165								307.85
														115.232								307.94
														116.602								309.049
														116.808								311.387
														119.894								314.77
														123.712								325.754
														124.774								328.706
														124.833								329.628
														126.44								333.788
														128.086								338.156
														131.329								340.266
														132.176								350.085
														133.376								352.11
														134.065								354.93
														135.011								355.916
														137.351								359.118
														137.43								362.227
														144.008								367.728
														146.526								368.948
														149.86								374.288
														150.951								377.804
														151.029								379.984
														151.631								380.988
														157.6								381.74
														158.051								383.714
														159.82								383.735
														162.097								385.637
														182.126								388.195
														184.322								388.341
														186.069								394.105
														187.721								394.532
														190.525								396.85
														192.113								398.136
														192.58								399.335
														193.12								410.067
														202.317								410.648
														203.207								411.764
														204.508								412.065
														205.176								413.838
														206.269								416.616
														207.627								420.102
														209.493								421.552
														210.326								428.065
														215.058								431.509
														220.078								434.977
														232.965								441.304
														233.636								441.32
														240.363								443.466
														241.564								447.675
														244.687								450.332
														245.48								452.539
														245.695								452.916
														245.931								453.432
														249.482								454.581
														251.842								458.081
														253.571								460.048
														254.114								468.536
														256.045								470.736
														263.193								473.037
														268.266								478.167
														268.972								479.993
														272.679								483.867
														272.807								493.628
														274.756								499.428
														277.686
														287.923
														292.693
														296.284
														297.59
														299.543
														320.114
														321.994
														332.072
														336.908
														341.303
														347.063
														350.927
														357.006
														359.174
														362.798
														365.044
														374.102
														384.922
														391.159
														396.404
														400.809
														440.025
														440.795
														468.764
														474.825
														475.337
														475.718

## Sheet: Scheme 3
Single-cell affinity measurements for scheme 3. Values are reported as dissociation constants (Kd) in nanoMolar units.
Time delay between injections (days)	7		14					28					56
Total number of measured cells per time delay (data pooled from all mice immunized with the same time delay)	100		893					635					298
Total number of measured cells per mouse	72	28	67	49	201	202	374	15	9	18	214	379	199	99
	213.67	4.53299	6.07301	17.1732	1.17637	1.52898	1.15244	436.03	443.002	442.769	362.1	1.15244	0.1	3.47744
	7.10186	5.34207	14.6458	28.0797	9.01984	2.75928	3.23471	402.892	222.669	427.205	487.379	3.23471	0.724422	4.32794
	7.83353	6.74468	33.4782	34.4522	12.7624	2.93856	3.68886	338.001	107.97	323.819	482.566	3.68886	1.73495	4.57594
	14.4407	9.63601	33.6082	36.8719	14.0968	4.1	7.8448	269.788	99.9507	272.782	447.456	7.8448	3.75681	6.97411
	17.8801	15.5667	36.5835	41.4248	15.6459	4.70003	10.0947	224.015	86.8635	253.839	447.22	10.0947	3.79438	11.2481
	21.6065	34.3608	49.8187	42.2259	19.7309	5.1	11.8191	181.949	57.9996	239.554	423.39	11.8191	3.87038	12.86
	25.3371	38.371	57.1656	50.2741	23.5116	6.25625	12.3561	177.44	28.9351	214.579	381.1	12.3561	3.94579	13.8143
	29.6197	60.8196	63.7302	51.439	27.9538	6.37619	12.7612	145.262	21.9805	145.495	400.862	12.6111	4.67893	15.7369
	30.3879	72.3393	77.8845	64.1384	28.6924	6.50554	12.8438	112.325	0.1	124.692	399.26	12.7612	4.83014	16.7961
	45.8739	78.1044	88.827	68.7601	29.3913	7.1	13.1012	97.1727		100.637	251.1	12.8438	5.32857	17.1176
	46.7802	82.4506	96.9242	83.7058	30.9423	7.48049	15.2632	96.1958		92.381	394.957	13.1012	6.34755	17.8362
	48.6461	87.8092	100.96	85.1636	34.7227	7.56031	16.05	71.427		86.3289	30.1	15.2632	7.84476	18.5419
	50.6783	124.863	104.431	87.6261	35.723	8.1	16.8857	39.9998		82.6408	387.883	16.05	8.34547	18.7266
	52.5032	132.592	105.178	91.5057	36.6004	8.28129	18.7703	28.1758		59.687	360.831	16.8857	8.41904	19.3468
	58.7125	138.765	105.544	92.863	37.743	8.98459	19.4951	8.72983		41.9888	360.548	18.7703	9.67748	19.3864
	62.3923	159.564	105.788	95.7134	37.8287	9.1	19.8361			32.5655	342.787	19.4951	9.92551	22.6576
	66.5322	163.951	109.854	104.152	40.3474	11.759	21.5871			10.8474	338.149	19.8361	10.0175	23.1468
	68.2391	180.549	114.227	111.905	41.7811	11.8451	21.6862			1.02006	332.233	21.5748	10.1372	23.4222
	69.0957	213.464	121.454	113.296	42.5395	12.9768	21.8881				291.1	21.5871	11.0624	24.4344
	70.8913	228.594	123.24	125.006	42.9852	13.6487	23.4946				328.033	21.6862	11.8143	30.5513
	72.5241	229.792	124.036	128.857	44.0174	14.245	25.3908				256.1	21.8881	12.3142	35.5337
	98.8582	231.818	135.178	130.109	45.6099	14.8484	25.8228				320.428	23.4946	12.5777	36.7447
	98.8944	299.678	135.487	133.504	46.7594	14.8743	26.0109				314.379	25.3908	13.8558	40.5961
	106.278	338.55	136.963	138.483	48.7308	15.1	26.9842				308.558	25.8228	15.9805	44.1472
	109.749	345.022	146.041	142.41	49.5918	17.3549	27.0491				298.831	26.0109	16.2725	47.2145
	112.75	389.394	153.687	142.459	49.9175	17.47	27.1197				67.1	26.9842	16.7836	47.5139
	118.781	406.064	158.921	155.052	50.2916	18.1	28.9088				288.527	27.0491	17.9402	48.132
	119.842	476.488	162.783	156.811	52.2155	19.6546	29.257				286.983	27.1197	18.0443	48.1927
	122.755		169.528	161.246	53.3825	20.1	29.8109				280.535	28.9088	18.0605	52.4432
	132.447		170.676	167.175	54.1425	20.5272	29.9605				243.1	29.257	18.4855	53.7011
	145.477		204.61	188.751	54.4669	23.1	30.7069				252.965	29.8109	18.7224	56.8927
	146.479		217.202	198.45	57.5102	23.1206	30.8945				102.1	29.9605	19.1257	57.7496
	147.093		220.595	202.621	57.5363	27.1563	30.9285				250.008	30.7069	19.4305	58.0877
	148.613		231.569	212.918	58.4755	27.6949	31.1512				241.021	30.8945	21.3865	60.3185
	153.959		237.709	230.851	59.2983	27.9971	32.521				238.292	30.9285	21.5371	61.5308
	154.238		238.031	232.165	60.0173	29.7784	32.6792				377.1	31.1512	22.2162	62.6569
	161.682		242.411	246.482	63.0925	30.0958	32.9336				296.1	32.521	22.6245	64.6996
	168.372		246.027	259.706	63.4032	30.1	33.3894				226.878	32.6792	24.3736	67.0197
	171.79		251.558	263.535	64.9627	30.3994	33.519				214.1	32.9336	24.8771	67.5467
	173.053		256.561	275.677	64.9667	31.4176	34.2295				226.167	33.3894	25.694	68.0006
	175.653		264.122	279.391	65.2675	31.6696	34.7859				428.1	33.519	25.7828	68.0724
	176.325		266.843	286.502	71.0629	31.7298	34.9838				78.1	34.2295	26.3656	68.2282
	176.636		271.876	331.249	74.6521	33.7289	35.0141				216.801	34.7859	27.52	73.7382
	183.884		277.803	331.428	74.766	35.4737	35.3119				214.961	34.9838	28.124	75.428
	186.977		281.384	376.64	78.7003	35.5103	35.3175				193.372	35.0141	28.3648	76.8105
	193.071		283.567	387.735	87.5086	36.2463	35.4277				192.633	35.3119	29.0407	78.2765
	194.691		307.665	399.793	87.7411	39.5673	37.1431				230.1	35.3175	29.5964	83.1136
	195.488		307.712	418.629	91.8061	41.1	38.0811				176.564	35.4277	30.2208	85.7328
	213.572		315.993	496.86	92.2113	43.1	38.9044				174.365	37.1431	30.4085	90.019
	214.634		330.536		92.2418	45.1	40.4334				283.1	38.0811	30.4928	97.5722
	239.479		339.258		92.7976	46.3897	40.545				161.425	38.9044	30.5843	100.655
	246.083		339.623		96.2397	46.9675	40.9746				160.123	40.4334	30.783	105.879
	247.533		341.235		97.3509	49.4101	41.4237				158.277	40.545	32.4437	110.421
	247.908		345.856		99.0702	51.3282	41.9901				157.133	40.9746	32.7588	118.467
	254.863		347.446		102.864	52.1	42.2243				275.1	41.4237	32.9674	119.916
	257.107		362.552		104.322	53.8908	42.2989				151.718	41.9901	33.5811	121.022
	285.422		383.592		104.492	54.4877	43.3978				151.043	42.2243	33.7298	127.723
	293.943		392.34		105.319	56.1	43.4545				147.195	42.2989	34.4531	133.222
	303.146		416.656		106.09	60.1	43.6103				152.1	43.3978	35.024	134.029
	308.747		424.966		108.131	64.4901	44.0728				203.1	43.4545	35.8639	138.198
	311.105		428.41		108.711	66.2885	44.3236				235.1	43.6103	36.9214	149.006
	352.597		438.917		108.987	66.4367	44.6538				426.1	44.0728	37.0439	152.177
	352.61		440.222		110.729	67.1	45.5461				141.426	44.3236	37.7144	152.263
	363.623		473.038		114.062	68.1	46.0014				140.232	44.6538	37.9057	157.644
	364.16		492.821		114.434	70.1	46.7905				223.1	45.5461	38.8298	160.493
	385.038		495.265		116.891	70.3688	48.6123				139.867	46.0014	40.2616	160.738
	396.303		496.679		118.88	73.3052	49.628				138.673	46.7905	40.7345	161.305
	415.852				119.219	77.1	50.5954				134.281	46.8075	42.0087	162.805
	415.874				121.933	77.7635	51.3913				331.1	48.6123	42.0903	169.435
	445.324				122.301	78.1	51.7476				257.1	49.628	43.5532	169.948
	450.233				123.408	79.1	51.9061				131.329	50.5954	44.1826	183.982
	454.766				125.863	80.1	52.629				258.1	51.3913	46.1782	187.8
					130.551	80.2698	53.0506				128.95	51.7476	46.3389	202.748
					131.107	81.3226	53.0939				128.557	51.9061	46.5791	209.961
					131.108	82.1	53.5681				127.601	52.629	49.1257	211.239
					131.92	83.1	53.5956				125.972	53.0506	49.1852	216
					132.198	84.0832	53.6296				106.1	53.0939	49.4847	216.555
					134.692	84.7637	53.9473				80.1	53.5681	52.7135	220.988
					135.411	85.1	54.7092				340.1	53.5956	55.3087	232.86
					137.227	85.9534	55.6217				119.106	53.6296	58.6965	235.68
					137.495	85.9583	55.9272				115.11	53.9473	59.5985	241.994
					138.335	86.3459	56.2139				114.273	54.7092	60.1914	247.547
					138.793	91.1935	56.495				109.23	55.6217	62.2529	279.279
					142.884	91.5292	56.7205				23.1	55.9272	64.0369	280.706
					144.98	93.1	61.2109				108.422	56.2139	66.2849	290.588
					150.112	96.1	61.8168				45.1	56.495	66.5404	296.437
					152.786	98.1	62.7152				106.107	56.7205	66.7184	305.42
					154.819	99.2814	63.0101				105.888	61.2109	66.8007	321.278
					155.614	102.1	63.6746				150.1	61.8168	67.7426	325.166
					159.481	102.179	64.5496				102.348	62.7152	68.3889	325.416
					160.561	102.348	65.1635				102.179	63.0101	69.0701	327.905
					160.837	105.1	65.2788				70.1	63.6746	69.539	331.704
					166.693	105.888	65.8014				99.2814	64.5496	70.6973	339.441
					171.932	106.1	66.6547				207.1	65.1635	71.1852	375.364
					173.165	106.107	66.7959				371.1	65.2788	72.7299	403.05
					173.215	108.1	67.3837				7.1	65.8014	74.283	436.043
					176.617	108.422	67.9852				91.5292	66.6547	76.6848	445.076
					178.986	109.23	68.5654				91.1935	66.7959	79.7609	445.678
					179.483	114.273	68.8899				401.1	67.3837	81.0371	478.682
					181.767	115.11	69.4686				320.1	67.9852	81.6298
					182.56	119.106	69.5988				86.3459	68.5654	82.0821
					195.058	125.972	69.6169				85.9583	68.8899	85.5903
					199.525	127.601	69.9188				85.9534	69.4686	86.2066
					203.659	128.557	70.8787				138.1	69.5988	86.6752
					205.539	128.95	71.3742				84.7637	69.6169	87.5129
					207.468	131.329	71.3761				84.0832	69.9188	88.714
					209.092	134.281	71.7772				108.1	70.8787	92.4482
					209.729	138.1	71.9772				8.1	71.3742	93.6781
					214.368	138.673	71.9815				81.3226	71.3761	93.8529
					217.83	139.867	72.0525				80.2698	71.7772	95.1483
					218.384	140.232	72.1694				78.2808	71.9772	95.6222
					222.574	141.426	72.3386				276.1	71.9815	97.8219
					223.867	144.1	72.4575				96.1	72.0525	101.713
					224.013	147.195	72.5189				77.7635	72.1694	105.264
					225.079	150.1	72.999				68.1	72.3386	108.813
					228.55	151.043	72.9996				105.1	72.4575	110.369
					232.244	151.718	74.2828				73.3052	72.5189	113.05
					233.846	152.1	74.383				392.1	72.999	113.539
					234.509	153.1	76.2454				70.3688	72.9996	115.49
					236.133	155.1	80.3312				153.1	74.2828	117.122
					236.576	157.133	80.683				309.1	74.383	117.759
					236.898	158.277	81.1556				66.4367	76.2454	123.718
					238.618	160.123	81.8452				66.2885	80.3312	124.32
					239.778	161.425	82.5007				64.4901	80.683	126.464
					240.059	167.1	83.8376				82.1	81.1556	133.129
					240.517	170.1	84.5813				167.1	81.8452	135.973
					242.291	174.365	87.0955				54.4877	82.5007	137.818
					248.996	176.564	87.4179				293.1	83.8376	148.28
					249.463	178.1	87.7627				345.1	84.5813	154.084
					251.796	179.1	87.93				53.8908	87.0955	154.684
					254.245	192.633	88.6053				43.1	87.4179	155.911
					256.134	193.372	88.7569				178.1	87.7627	156.776
					256.409	203.1	92.3948				20.1	87.93	167.685
					260.298	207.1	92.5366				179.1	88.6053	170.71
					262.209	214.1	92.7799				51.3282	88.7569	173.006
					265.079	214.961	93.7488				49.4101	92.3948	174.943
					265.802	216.801	93.9073				46.9675	92.5366	175.22
					266.146	223.1	94.3925				4.1	92.7799	177.202
					272.684	226.167	94.9978				46.3897	93.7488	178.68
					272.89	226.878	95.5573				383.1	93.9073	182.896
					275.465	230.1	96.0228				233.1	94.3925	186.833
					284.179	233.1	96.43				85.1	94.9978	188.166
					286.597	235.1	98.9171				64.1	95.5573	189.221
					295.953	236.1	100.256				56.1	96.0228	191.446
					298.031	238.292	100.276				93.1	96.43	197.448
					300.418	241.021	102.334				39.5673	98.9171	198.083
					301.254	243.1	102.576				273.1	100.256	200.862
					308.775	245.1	103.354				36.2463	100.276	201.347
					314.505	250.008	103.757				35.5103	102.334	201.532
					315.793	250.1	105.267				35.4737	102.576	204.73
					315.865	251.1	105.553				33.7289	103.354	210.994
					316.329	252.965	105.914				271.1	103.757	213.793
					321.112	256.1	107.472				31.8383	105.267	216.345
					321.537	258.1	108.515				31.7298	105.553	224.231
					322.237	271.1	109.275				31.6696	105.914	230.109
					322.451	273.1	109.864				250.1	107.472	230.938
					325.138	274.1	111.153				31.4176	108.515	232.068
					325.148	275.1	111.403				30.3994	109.275	237.927
					327.591	276.1	111.617				282.1	109.864	237.983
					329.719	280.535	113.039				30.0958	111.153	251.05
					331.577	283.1	114.267				29.7784	111.403	251.177
					333.559	286.983	114.271				301.1	111.617	254.529
					339.074	288.527	114.737				27.9971	113.039	260.577
					339.784	291.1	115.15				27.6949	114.267	261.56
					339.921	293.1	115.291				27.1563	114.271	262.671
					340.064	296.1	115.577				245.1	114.737	275.881
					341.1	298.831	115.761				334.1	115.15	276.034
					341.55	301.1	116.591				24.3559	115.291	282.374
					341.636	305.1	118.227				23.1206	115.577	288.289
					344.048	308.558	119.202				170.1	115.761	292.997
					347.845	309.1	119.998				305.1	116.591	296.875
					350.466	314.379	120.226				397.1	118.227	303.945
					356.943	320.1	120.712				98.1	119.202	305.517
					357.114	320.428	121.788				18.1	119.998	307.871
					359.886	328.033	123.926				52.1	120.226	307.947
					372.88	332.233	127.475				20.5272	120.712	308.854
					374.31	334.1	127.894				144.1	121.788	314.424
					378.293	338.149	129.313				19.6546	123.926	317.883
					380.548	340.1	130.338				83.1	124.946	318.97
					384.383	342.787	131.21				406.1	127.475	323.237
					386.273	345.1	131.324				236.1	127.894	339.087
					389.72	360.548	131.66				3.1	129.313	353.802
					392.069	360.831	131.897				17.47	130.338	361.041
					404.094	362.1	133.165				17.3549	131.21	363.175
					407.656	371.1	134.986				49.1	131.324	364.219
					416.588	377.1	135.725				79.1	131.66	365.405
					423.247	381.1	136.594				14.8743	131.897	372.238
					438.748	383.1	137.872				14.8484	133.165	382.061
					443.023	387.883	139.973				14.245	134.743	386.069
					448.166	392.1	140.432				13.6487	134.986	394.642
					451.288	397.1	141.664				12.9768	135.725	397.124
					451.293	399.26	142.337				155.1	136.594	404.007
					455.36	400.862	146.949				11.8451	137.872	405.425
					460.609	401.1	147.947				11.759	139.973	424.952
					461.365	406.1	149.393				77.1	140.432	445.769
					464.592	423.39	150.704				8.98459	141.664	446.969
					465.864	426.1	153.636				90.1	142.337	484.353
					465.878	428.1	153.709				8.28129	146.949	486.156
					472.339	447.22	155.134				7.56031	147.947	492.462
					488.61	447.456	156.614				7.48049	149.393
					498.307	482.566	157.502				6.50554	150.704
						487.379	157.856				6.37619	153.636
							160.714				6.25625	153.709
							161.029				5.1	155.134
							162.394				274.1	156.614
							163.032				76.1	157.502
							163.644				4.70003	157.856
							165.304				9.1	160.714
							172.038				15.1	161.029
							172.778				60.1	162.394
							172.793				2.93856	163.032
							173.539				2.75928	163.644
							173.94				41.1	165.304
							177.111				1.52898	172.038
							177.285					172.778
							177.48					172.793
							179.419					173.539
							179.628					173.94
							180.52					177.111
							180.709					177.285
							180.753					177.48
							181.143					179.419
							181.329					179.628
							184.717					180.52
							185.328					180.709
							186.737					180.753
							189.855					181.143
							192.09					181.329
							194.852					184.717
							198.431					185.328
							200.582					186.737
							201.006					189.855
							202.478					192.09
							202.962					194.852
							203.466					198.431
							204.416					200.582
							204.994					201.006
							206.193					202.478
							206.872					202.962
							208.582					203.466
							208.896					204.416
							209.244					204.994
							212.287					206.193
							214.061					206.872
							215.254					208.582
							217.026					208.896
							217.251					209.244
							219.195					212.287
							220.163					214.061
							221.282					215.254
							221.42					217.026
							222.981					217.251
							224.36					219.195
							224.576					220.163
							225.479					221.282
							225.84					221.42
							226.156					222.981
							227.112					224.36
							229.08					224.576
							229.61					225.479
							231.086					225.84
							233.593					226.156
							234.819					227.112
							236.196					229.08
							236.357					229.61
							236.697					231.086
							238.735					233.593
							241.545					234.819
							242.091					236.196
							243.999					236.357
							246.302					236.697
							247.029					238.735
							252.324					241.545
							252.394					242.091
							254.111					243.999
							254.654					246.302
							256.206					247.029
							256.477					252.324
							256.988					252.394
							258.413					254.111
							260.884					254.654
							263.423					256.206
							264.242					256.477
							265.602					256.988
							267.108					258.413
							268.726					260.884
							268.879					263.423
							269.478					264.242
							269.587					265.602
							281.037					267.108
							282.126					268.726
							283.476					268.879
							283.66					269.478
							286.558					269.587
							287.641					281.037
							290.339					282.126
							290.587					283.476
							290.64					283.66
							291.081					286.558
							291.114					287.641
							292.527					290.339
							295.013					290.587
							297.78					290.64
							298.603					291.081
							299.788					291.114
							302.613					292.527
							303.973					295.013
							303.978					297.78
							304.805					298.603
							307.053					299.788
							307.85					302.613
							307.94					303.973
							309.049					303.978
							311.387					304.805
							314.77					307.053
							325.754					307.85
							328.706					307.94
							329.628					309.049
							333.788					311.387
							338.156					314.77
							340.266					325.754
							350.085					328.706
							352.11					329.628
							354.93					333.788
							355.916					338.156
							359.118					340.266
							362.227					350.085
							367.728					352.11
							368.948					354.93
							374.288					355.916
							377.804					359.118
							379.984					362.227
							380.988					367.728
							381.74					368.948
							383.714					374.288
							383.735					377.804
							385.637					379.984
							388.195					380.988
							388.341					381.74
							394.105					383.714
							394.532					383.735
							396.85					385.637
							398.136					388.195
							399.335					388.341
							410.067					394.105
							410.648					394.532
							411.764					396.85
							412.065					398.136
							413.838					399.335
							416.616					410.067
							420.102					410.648
							421.552					411.764
							428.065					412.065
							431.509					413.838
							434.977					416.616
							441.304					420.102
							441.32					421.552
							443.466					428.065
							447.675					431.509
							450.332					434.977
							452.539					441.304
							452.916					441.32
							453.432					443.466
							454.581					447.675
							458.081					450.332
							460.048					452.539
							468.536					452.916
							470.736					453.432
							473.037					454.581
							478.167					458.081
							479.993					460.048
							483.867					468.536
							493.628					470.736
							499.428					473.037
												478.167
												479.993
												483.867
												493.628
												499.428
